# Supplementary material for: Synthesis and characterization of organic–inorganic hybrid mesoporous silica materials with new templates
Source: Royal Society of Chemistry journal article supplement (doi:10.1039/b312178j), 2004-01-01
Supplement: b312178j.doc [file b312178j.doc]

**Supporting Materials**

**(1) *Synthesis of templates***

1-Hexadecane-3-methylimidazolium bromide (C16MIB) and 1-hexadecane-2,3-dimethylimidazolium bromide (C16DMIB) were synthesized by the following procedures. (see: Bonhote, P.; Dias, A. P.; Papageorgiou, N.; Kalyanasundaram, K.; and Gratzel, M. *Inorg. Chem.* **1996**, *35*, 1168)

***Synthesis of 1***-***Hexadecane-3-methylimidazolium bromide* (C16MIB)**

Equal molar ratio amounts of 1-methylimidazole (1.98 g, 24.11 mmol), 1-bromohexadecane (7.38 g, 24.17 mmol), and 20 mL acetonitrile were mixed in a 100 mL flask. The mixture was stirred at 85C for 24 hours under argon atmosphere. The crude product (10 g) was obtained as a yellow wax after solvents were evaporated off by rotary evaporator. Recrystalization in warm acentonitrile (40 mL) gave the purified product as a white solid (8.6 g, 22.20 mmol, 91.9%). Spectral data for 1H-NMR [CDCl3, /ppm relative to trimethylsilane(TMS)] are as follows: 10.18 (s, 1H), 7.77 (s, 1H), 7.59 (s,1H), 4.33 (t, 2H), 4.13 (s, 3H), 1.92 (m, 2H), 1.27 (m, 26H), and 0.88 (t, 3H). Data for 13C-NMR are as follows: 136.32 (CH), 123.31 (CH), 121.58 (CH), 46.52 (CH2), 36.19 (CH3), 31.38 (CH2), 29.84 (CH2), 29.16 (CH2), 29.12 (CH2), 29.01 (CH2), 28.88 (CH2), 28.83 (CH2), 28.51 (CH2), 25.74 (CH2), 22.16 (CH2), and 13.64 (CH3).

***Synthesis of 1***-***Hexadecane-2,3-dimethylimidazolium bromide* (C16 DMIB)**

The above same procedure was used. The purified product as a white solid (33.85 g, 84.3 mmol, 89.6%) was obtained from the reaction of 1,2-dimethylimidazole (9.05 g, 94.1 mmol), 1-bromohexadecane (28.73 g, 94.1 mmol). Spectral data for 1H-NMR [CDCl3, /ppm relative to trimethylsilane(TMS)] are as follows: 7.81 (s, 1H), 7.54 (s,1H), 4.24 (t, 2H), 4.05 (s, 3H), 2.81 (s, 3H), 1.82 (m, 2H), 1.28 (m, 26H), and 0.87 (t, 3H). Data for 13C-NMR are as follows: 143.50 (C), 122.84 (CH), 120.83 (CH), 48.80 (CH2), 36.04 (CH3), 31.70 (CH2), 29.73 (CH2), 29.47 (CH2), 29.33 (CH2), 29.20 (CH2), 29.15 (CH2), 28.88 (CH2), 26.19 (CH2), 22.48 (CH2), 13.95 (CH3), and 10.87 (CH3).

# (2) Preparation of mesoporous materials

Periodic mesoporous organosilica materials with ethane-bridge (**PMO-E-M** and **PMO-E-DM**) and mesoporous silica material (**MS-M**) were synthesized using C16MIB and C16DMIB as templates.

Synthesis of **PMO-E-M**

Sodium hydroxide (0.51 g, 97+%, Aldrich) was dissolved in 53 g of deionized water. The synthesized surfactant C16MIB (0.5 g) was added to this solution, and vigorously stirred. If needed, this mixture was heated to dissolve the surfactant completely in solution. To this solution, 4.5 g of silica precursor bis(triethoxysilyl)ethane (BTSE, Gelest) was added and vigorously stirred for 24 hours at room temperature. The surfactant was removed by extraction of as-synthesized sample (0.1 g) with a solution of 18.4 mL of ethanol and 2 g of aqueous HCl (37%) three times at room temperature. The extracted sample was washed with copious amounts of water and ethanol and then vacuum dried for 6 hours at 80 C.

Synthesis of **PMO-E-DM**

Sodium hydroxide (0.41 g) was dissolved in 43 g of deionized water. C16DMIB (0.5 g) was added to this solution, and vigorously stirred. If needed, this mixture was heated to dissolve the surfactant completely in solution. To this solution, 3.7 g of BTSE was added and vigorously stirred for 24 hours at room temperature. The subsequent process is similar to that for the preparation of **PMO-E-M**.

Synthesis of **MS-M**

Sodium hydroxide (0.27 g) was dissolved in 22 g of deionized water. C16MIB (0.3 g) was added to this solution, and vigorously stirred. If needed, this mixture was heated to dissolve the surfactant completely in solution. To this solution, 2.0 g of tetraethyl orthosilicate (TEOS, 98%, Aldrich) was added and vigorously stirred for 24 hours at room temperature. The subsequent process is similar to that for the preparation of **PMO-E-M**.
